# Supplementary material
Source: PubMed Central journal article supplement (PMC5595097)
Supplement: NIHMS862840-supplement.pdf [file NIHMS862840-supplement.pdf]

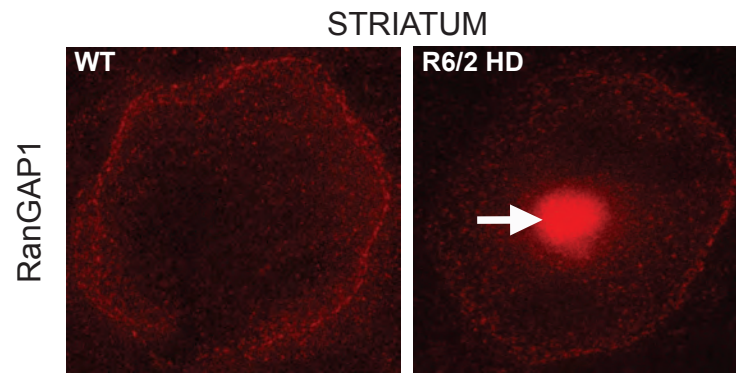

Figure S1 (related to Figure 1). Stimulated Emission Depletion (STED) Super Resolution Image of Striatal RanGAP1 in the R6/2 Mouse Model of HD. Severe intranuclear aggregation of RanGAP1 (red) in the striatum of 10 week old TG R6/2 mice.

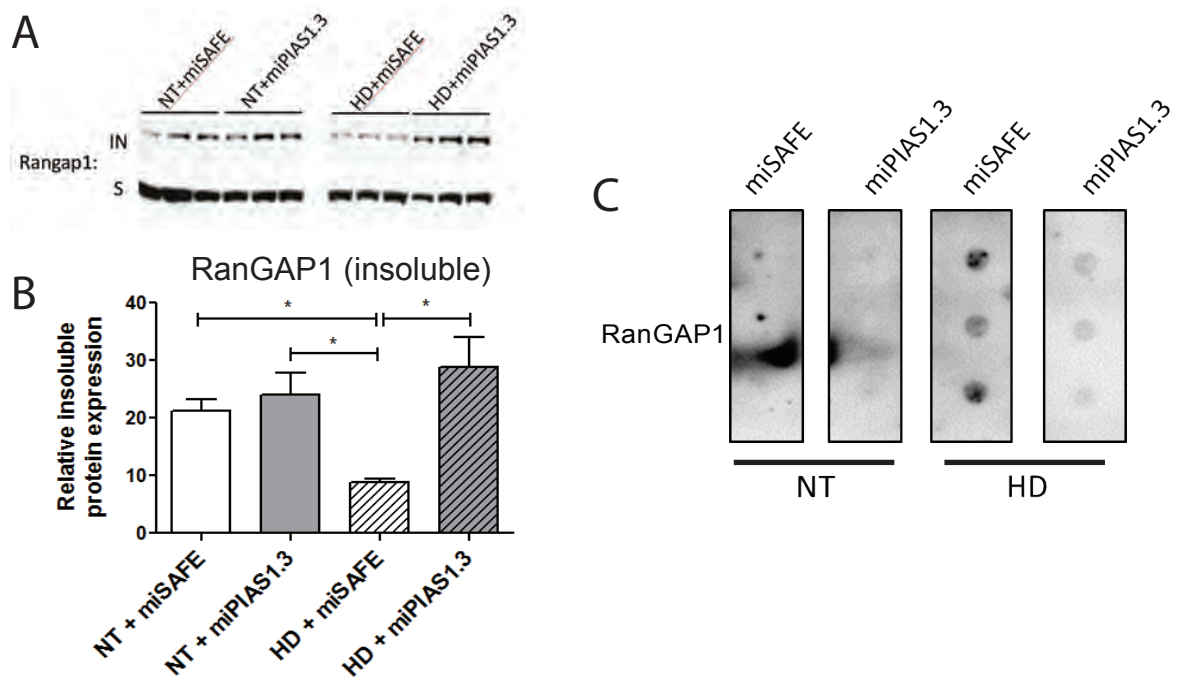

**Figure S2 (related to Figure 1). Immunoblotting of RanGAP1 from 10-Week-Old R6/2 and Non-Transgenic Mouse Striatal Lysates Following Viral Mediated miSAFE or miPIAS1.3 Treatment.** (A) Insoluble RanGAP1 levels are significantly reduced in the striatum of R6/2 mice compared to non-transgenic (NT) mice. Following miPIAS1.3 treatment, insoluble RanGAP1 levels are significantly increased in R6/2, but not NT mice compared to miSAFE treatment. (B) All data are expressed as western densitometry quantitation. Protein expression was validated for protein loading prior to antibody incubation using reversible protein stain and each samples' corresponding soluble  $\alpha$ -tubulin expression. (C) Insoluble RanGAP1 accumulates and is sequestered into insoluble fibular aggregates in the striatum of R6/2 mice compared to NT mice as measured by filter retardation assay. Following miPIAS1.3 treatment, accumulated insoluble RanGAP1 is reduced relative to miSAFE treated R6/2 mice. Quantified data are presented as mean  $\pm$  SEM. \* $P < 0.05$  as analyzed by two-way ANOVA followed by Tukey's post-hoc analysis.

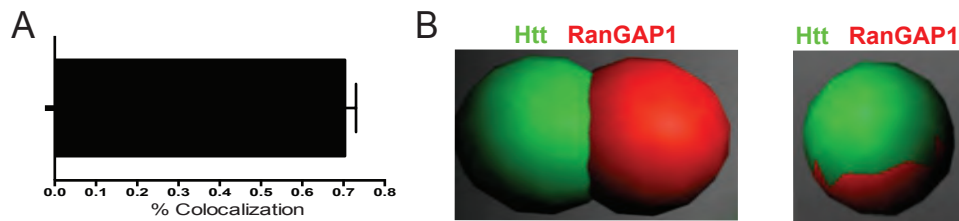

**Figure S3 (related to Figure 2). Colocalization of Striatal RanGAP1 and mHtt Aggregates in the zQ175 Mouse Model of HD.** IMARIS imaging software was employed to analyze colocalization of RanGAP1 and mHtt following immunostaining and confocal imaging. Approximately 70% of RanGAP1 aggregates were found to colocalize with mHtt aggregates in striatal and cortical neurons.

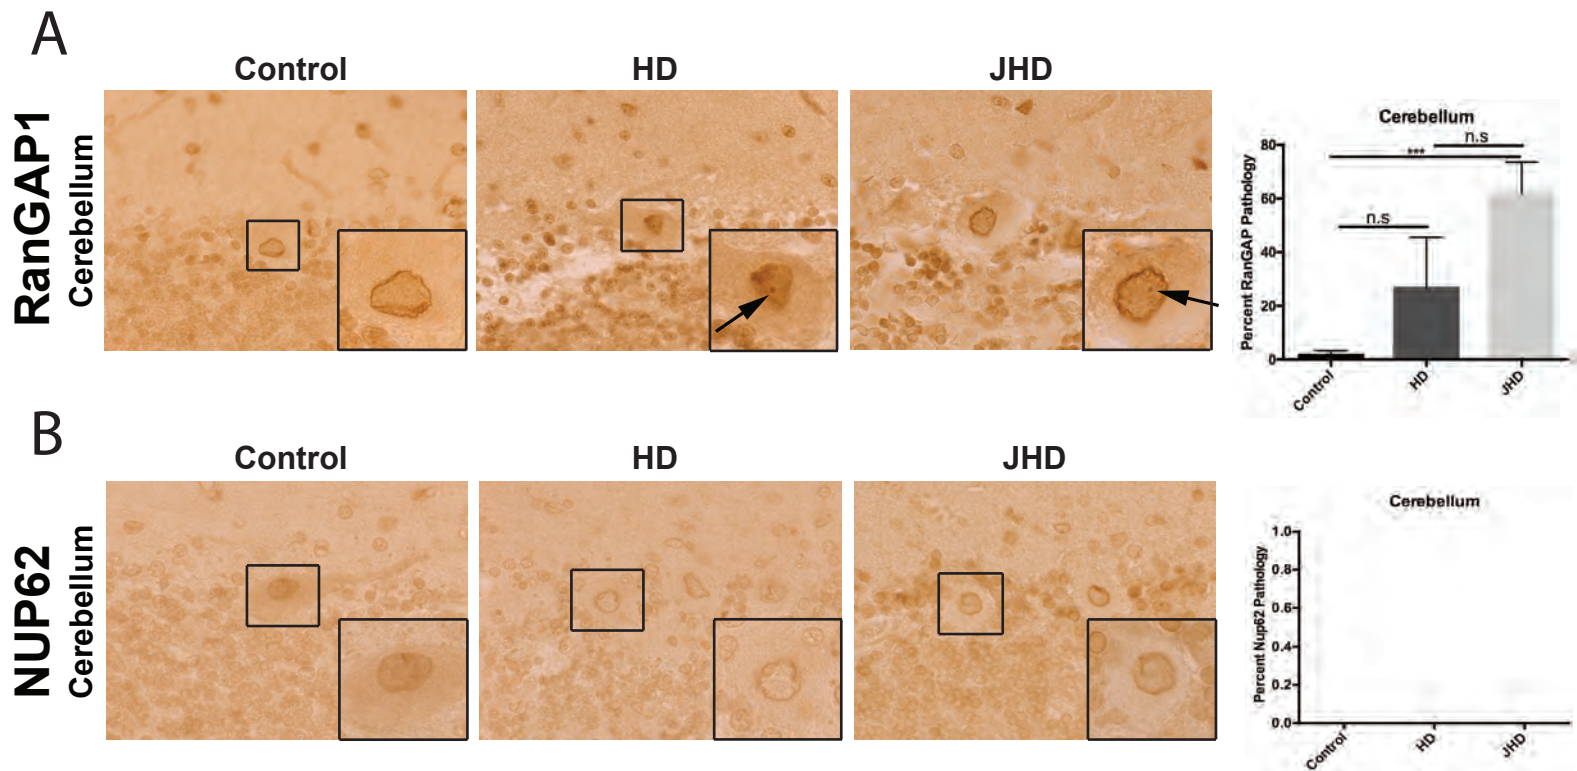

**Figure S4 (related to Figure 3). RanGAP1 and NUP62 Immunostaining in Human HD and JHD Cerebellum.** (A) RanGAP1 immunostaining in non-neurological disease control (n=10), HD (n=5), and JHD (n=5) cerebellum showing aggregates of RanGAP1 (arrows). Quantitation of percent of RanGAP1-positive cells with RanGAP1 pathology (aggregation) shown on the right of the representative images. Data are presented as mean  $\pm$  SEM. \*\*\* $P < 0.001$  as analyzed by one-way ANOVA followed by Tukey's post-hoc analysis. (B) NUP62 immunostaining in non-neurological disease control (n=10), HD (n=5), and JHD (n=5) cerebellum showing no pathology. Quantitation of percent of NUP62-positive cells with NUP62 pathology shown on the right of the representative images. Data are presented as mean  $\pm$  SEM

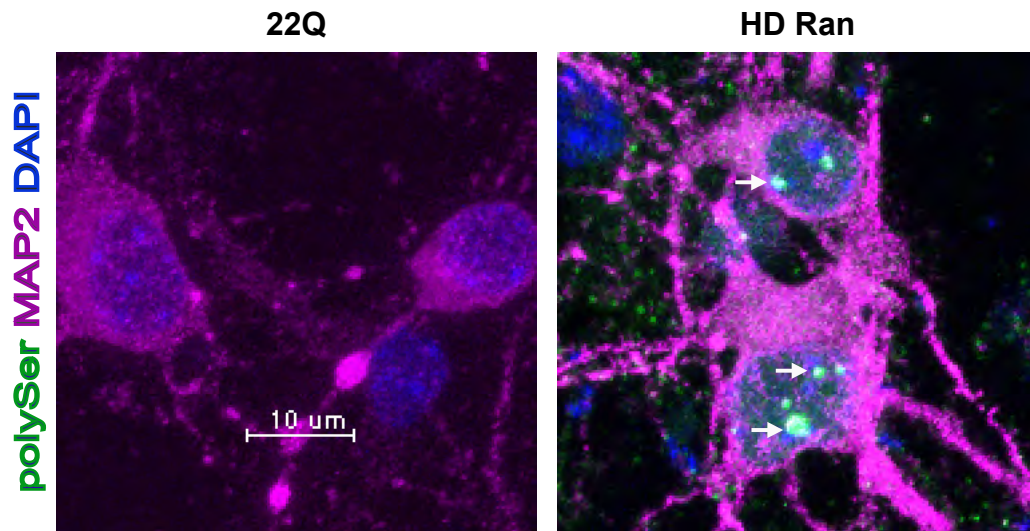

**Figure S5 (related to Figure 6). Detection of HD-RAN Protein After Transfection with 6xStop-(CAG)80.** Detection of polySer HD-RAN protein aggregates (arrows) after transfection with 6xStop-(CAG)80 in primary cortical neurons. PolySer HD-RAN protein aggregates are not detected after transfection with HTT 22Q control.

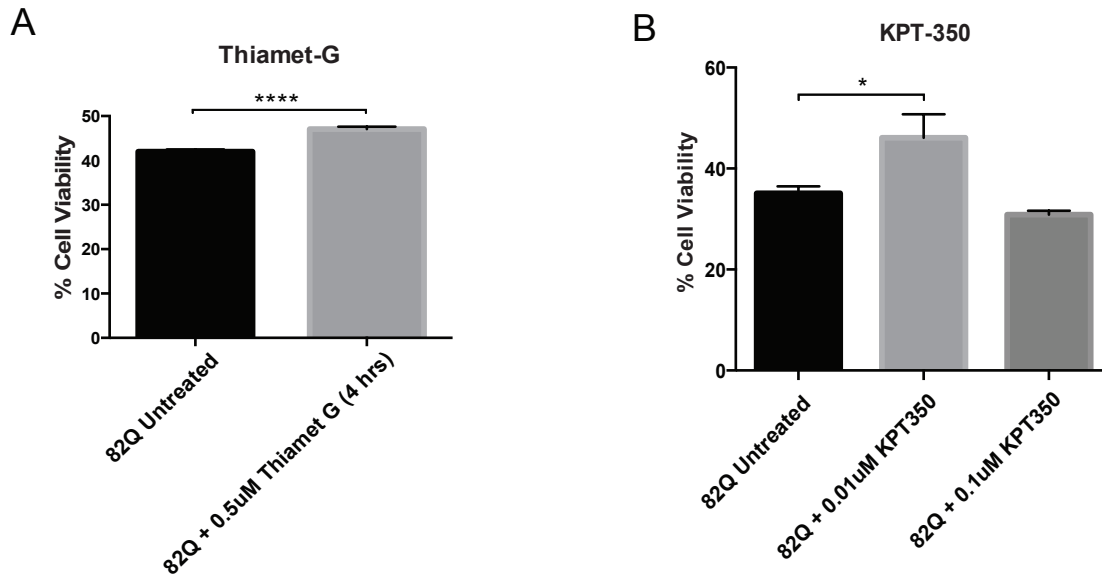

**Figure S6 (related to Figure 8). Thiamet-G and KPT-350 Individually Increase Cell Viability in Primary Cortical Neurons Transfected with Full-Length mHTT.**

(A) Cell viability is increased in primary cortical neurons transfected with HTT 82Q when treated with 500nM Thiamet G for 4 hours beginning 44 hours after transfection. Experiment represents the average of 4 wells total per condition. (B) Cell viability is increased in primary cortical neurons transfected with HTT 82Q when treated with 0.01  $\mu$ M KPT-350 at the time of transfection for 48 hours. Experiment represents the average of 4 wells. Data (A,B) are presented as mean  $\pm$  SEM. \* $P < 0.05$  and \*\*\*\* $P < 0.0001$  as analyzed by one-way ANOVA followed by Tukey's post-hoc analysis.

**Table S1 (related to Figures 1 and 2). Summary of NUPs and NPC-Associated Proteins Assessed in R6/2 and Q175 Mice**  
regarding all NUPs and NPC-associated proteins analyzed in R6/2 and Q175 mice, including anatomical location, domain, function, post-translational modification, and antibody used for analysis.

| NUP or NPC-Associated                                     | Anatomical Location in             | NUP Structures or                                                    | NUP Function                                                                                                                             | Post-translational                                                    | Antibody Used                                           |
|-----------------------------------------------------------|------------------------------------|----------------------------------------------------------------------|------------------------------------------------------------------------------------------------------------------------------------------|-----------------------------------------------------------------------|---------------------------------------------------------|
| GLE1                                                      | Cytoplasmic ring/filaments         | Coiled-coils                                                         | With cofactor IP6 and Dbp5: stimulates mRNP remodeling and mRNA export, translation                                                      | -----                                                                 | Anti-GLE1 (ab96007)                                     |
| NUP88                                                     | Cytoplasmic ring/filaments         | <b><math>\beta</math>-propeller and coiled-coils</b>                 | <b>Together with Nup214, may regulate localization of CRM1</b>                                                                           | <b>O-GlcNAc</b>                                                       | <b>Anti-NUP88 (ab79785)</b>                             |
| RanGAP1                                                   | Cytoplasmic ring/filaments         | <b>Leucine-rich repeats</b>                                          | <b>GTPase activating protein stimulating dissociation of exporter complexes at the NPC</b>                                               | <b>Phosphorylation by CDK1, SUMOylation by SUMO1 for NE targeting</b> | <b>Anti-RanGAP1 (H-180) (sc25630)</b>                   |
| RanBP2 (NUP358)                                           | Cytoplasmic ring/filaments         | FG repeats                                                           | Major component of cytoplasmic filaments, binding site for RanGAP1, also an E3 SUMO-protein ligase                                       | O-GlcNAc, phosphorylation, ubiquitinated by PARK-2, acetylated        | Anti-RanBP2 (abn1385)                                   |
| NUP214                                                    | Cytoplasmic ring/filaments         | FG and FxFG repeats, $\beta$ -propeller, coiled-coils                | mRNA export by binding Dbp5 (Dickmanns), potentially protein export, together with Nup214, may regulate localization of CRM1             | O-GlcNAc                                                              | Anti-NUP214 (a300716a)                                  |
| RanBP17                                                   | Cytoplasmic ring/filaments         | Belongs to exportin family                                           | Member of importin-beta superfamily of nuclear transport receptors and binds Ran-GTP                                                     | -----                                                                 | Anti-RanBP17 (nbp191029)                                |
| ALADIN                                                    | Central channel                    | WD repeats and $\beta$ -propellers                                   | Selective cargo import; interaction with ferritin heavy-chain (FTH1)                                                                     | Acetylation, Phosphoprotein (Uniprot)                                 | Anti-Aladin (a304514a)                                  |
| NUP62                                                     | Central channel                    | <b>Coiled-coils and FG repeats</b>                                   | <b>Associates with importin alpha/<math>\beta</math> complex during protein import and interacts with NTF2</b>                           | <b>O-GlcNAc</b>                                                       | Anti-NUP62 (sc25523)                                    |
| NUP54                                                     | Central channel                    | FG repeats                                                           | Forms complex with                                                                                                                       | O-GlcNAc                                                              | Anti-NUP54                                              |
| XPO1 (CRM1/Exportin-1)                                    | Nuclear ring/basket                | HEAT repeats                                                         | Mediates nuclear protein export for cargoes with a leucine-                                                                              | Acetylation, Phosphoprotein                                           | Anti-XPO1 (pa513642)                                    |
| NUP153                                                    | Nuclear ring/basket                | Zinc fingers                                                         | Links TPR to the nuclear basket (Hase and Cordes), high                                                                                  | O-GlcNAc, phosphorylation                                             | Anti-NUP153 (sc292438)                                  |
| NUP50                                                     | Nuclear ring/basket                | alpha/ $\beta$ -domains                                              | Interacts with Nup153 and stimulates importin a/b-dependent import                                                                       | O-GlcNAc                                                              | Anti-NUP50 (pa528452)                                   |
| TPR                                                       | Nuclear ring/basket                | heptad repeat / coiled-coil or leucine zipper motifs                 | Binds to Nup153 at the basket (Xu), forms heterochromatin-exclusion zones (Krull), CRM1-dependent                                        | O-GlcNAc                                                              | Anti-TPR (ihc00099)                                     |
| RCC1                                                      | Nuclear ring/basket                | RCC1 repeats                                                         | Ran guanine-nucleotide exchange factor- reloads GTP at the nuclear face and                                                              | Methylation                                                           | Anti-RCC1 (hpa027574)                                   |
| NXF1                                                      | Nuclear ring/basket                | Leucine-rich repeats and RNP-type RBD                                | Non-karyopherin transport heterodimer critical for mRNP export                                                                           | Acetylation, nitration                                                | Anti-NXF1 (ab50609)                                     |
| NUP98                                                     | Central channel and Nuclear basket | FG-repeats, GLFG-repeats, $\beta$ -sandwich                          | Binds transporters like importin- $\beta$ , transportin, and TAP and Rae1, affects transportin-dependent import and promotes CRM1 export | O-GlcNAc                                                              | Anti-NUP98 (generously provided by Dr. Michael Matunis) |
| POM121                                                    | Transmembrane                      | Transmembrane helices and FG-repeats                                 | Anchors the NPC to the NE; recruits Nup62 and Nup358 to the NPC                                                                          | O-GlcNAc                                                              | Anti-POM121 (pa527623)                                  |
| NUP93                                                     | Scaffold                           | alpha-helical and/or $\beta$ -propellers                             | Forms subunit complexes and may serve in anchoring                                                                                       | O-GlcNAc, phosphorylation                                             | Anti-NUP93 (nbp181546)                                  |
| NUP107                                                    | Scaffold                           | alpha-helical and/or $\beta$ -propellers                             | Forms Y-subcomplex with Nup160, an essential structural                                                                                  | O-GlcNAc                                                              | Anti-NUP107 (p8530774)                                  |
| NUP35                                                     | Scaffold                           | alpha-helical and/or $\beta$ -propellers,RRM, alpha/ $\beta$ domains | Forms linker nucleoporins with Nup93                                                                                                     | O-GlcNAc                                                              | Anti-NUP35 (generously provided by Dr. Michael Matunis) |
| Red = Pathologic                                          |                                    |                                                                      |                                                                                                                                          |                                                                       |                                                         |
| *NUPs and NPC-associated proteins as assessed in R6/2 and |                                    |                                                                      |                                                                                                                                          |                                                                       |                                                         |

**Table S2 (related to Figure 3). Patient Demographics for Postmortem Control, HD, and JHD Brain Tissues.** Description of human control, HD, and JHD brain tissues used in this study.

|                                   |             |     | Human Patient Demographics |                  |                 |
|-----------------------------------|-------------|-----|----------------------------|------------------|-----------------|
| FDX                               | Case Number | Age | Sex/Race                   | PostMortem Delay | Vonsattel Grade |
| CTRL                              | 305         | 60  | M/B                        | 12               | -               |
|                                   | 326         | 50  | M/W                        | 33               | -               |
|                                   | 354         | 44  | M/W                        | 34               | -               |
|                                   | 528         | 31  | M/B                        | 26               | -               |
|                                   | 529*        | 51  | M/W                        | 10               | -               |
|                                   | 269         | 29  | F/AA                       | 26               | -               |
|                                   | 394         | 27  | M/W                        | 13               | -               |
|                                   | 427         | 23  | F/W                        | 40               | -               |
|                                   | 482         | 23  | F/W                        | 18               | -               |
|                                   | 518         | 30  | F/W                        | 9                | -               |
|                                   |             |     |                            |                  |                 |
| HD                                | 283         | 51  | F/W                        | 22               | 4               |
|                                   | 285         | 32  | M/W                        | 18               | 4               |
|                                   | 292         | 46  | F/W                        | 7                | 4               |
|                                   | 313         | 57  | M/W                        | 4.5              | 4               |
|                                   | 257         | 44  | F/W                        | 5                | 3               |
| JHD                               | 88          | 29  | F/B                        | 17               | 4               |
|                                   | 105         | 27  | M/W                        | 22               | 4               |
|                                   | 216         | 23  | F/B                        | 14               | 4               |
|                                   | 243         | 23  | F/W                        | 13               | 3 -- 4          |
|                                   | 264         | 29  | F/W                        | 49               | 4               |
|                                   |             |     |                            |                  |                 |
| HD=Huntington's disease           |             |     |                            |                  |                 |
| JHD=Juvenile Huntington's disease |             |     |                            |                  |                 |
| CTRL= Control                     |             |     |                            |                  |                 |

Table S3 (related to Figure 4). Patient Demographics for Control and HD iPS Cell Lines. Description of human control and HD iPS cell lines used in this study.

### Control and HD iPS Cell Lines

| iPS Cell Line     | Clone | Gender | Diagnosis         | CAG repeats | Coriell Catalog ID (fibroblasts) | Reference                     |
|-------------------|-------|--------|-------------------|-------------|----------------------------------|-------------------------------|
| CS14iCTR28 (28Q)  | n6    | F      | Clinically normal | 28          | GM03814                          | Sareen et al. (2012)          |
| CS03iHD53 (53Q)   | n3    | M      | HD                | 53          | Submitted, pending               | HD iPSC Consortium (in press) |
| CS09iHD109 (109Q) | n1    | F      | HD                | 109         | ND39258                          | Mattis et al. (2015)          |
